# Supplementary material
Source: publisher site journal article supplement (https://www.dovepress.com/article/285257)
Supplement: Supplementary file 1 [file get_supplementary_file.php]

**Supplementary Figure 1.** Changes in mean BCVA in eyes with neovascular AMD and pachychoroid neovascularopathy treated with intravitreal aflibercept injection.

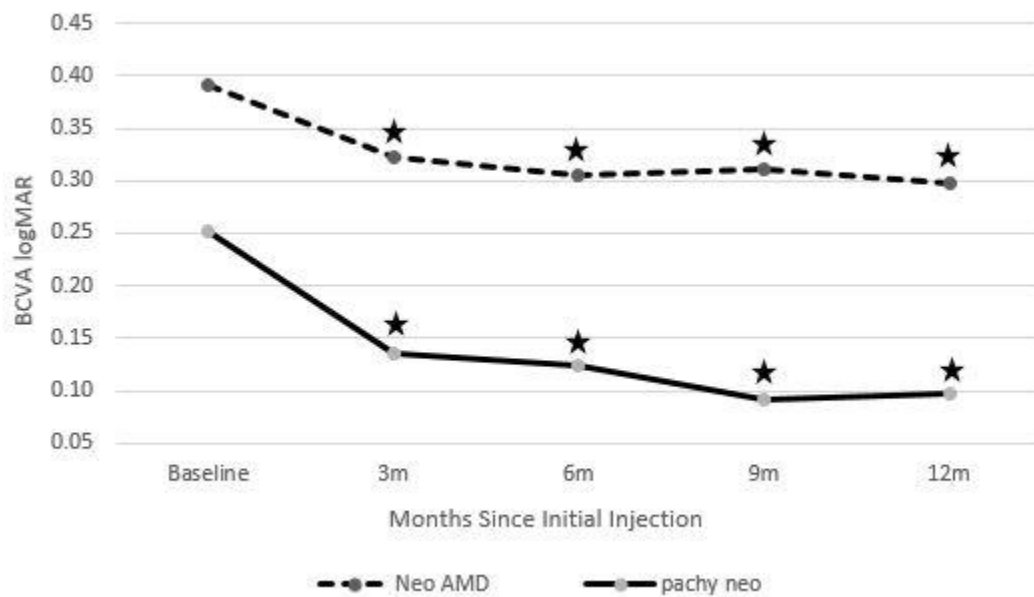

Star: significant difference from baseline.

BCVA = best-corrected visual acuity; AMD = age-related macular degeneration; logMAR = logarithm of minimal angle of resolution.

**Supplementary Figure 2.** Changes in mean central retinal thickness in eyes with neovascular AMD and pachychoroid neovascularopathy treated with intravitreal aflibercept injection.

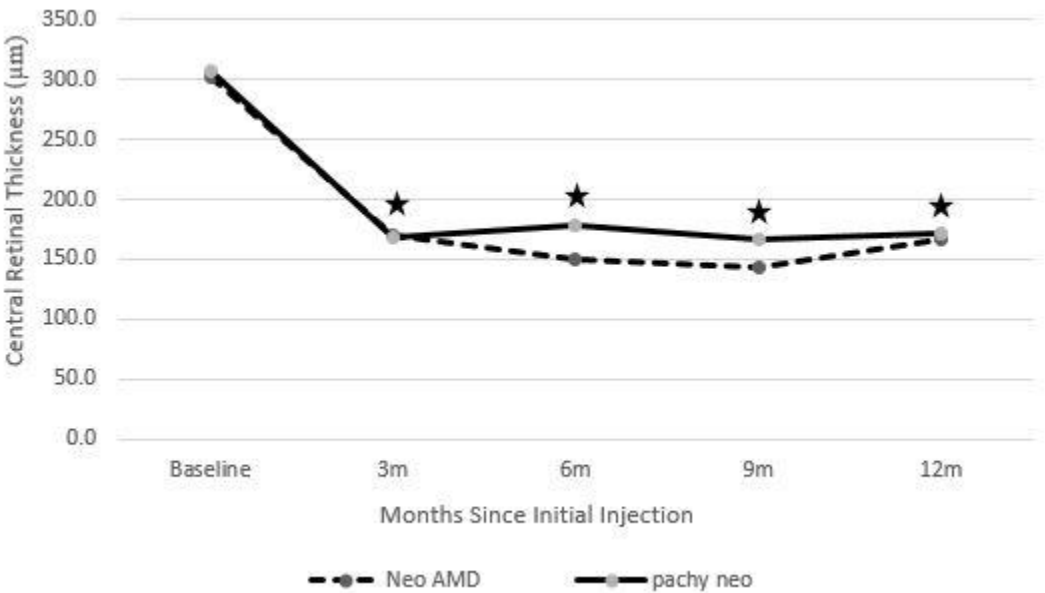

Star: significant difference from baseline.

AMD = age-related macular degeneration.

**Supplementary Figure 3.** Changes in mean subfoveal choroidal thickness in eyes with neovascular AMD and pachychoroid neovascularopathy treated with intravitreal aflibercept injection.

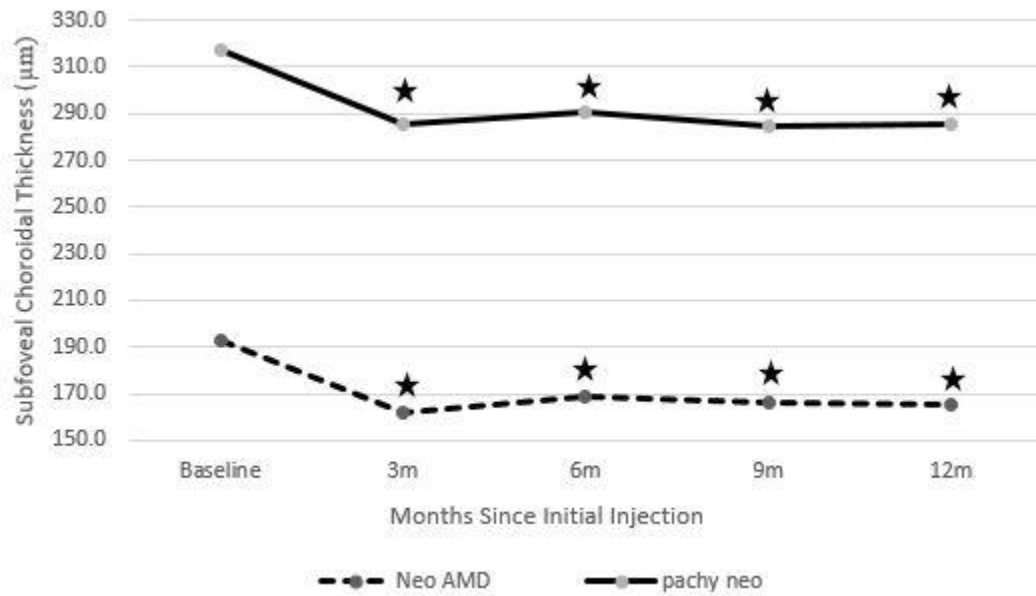

Star: significant difference from baseline.

AMD = age-related macular degeneration.
